# Supplementary material for: Perceived risk of electronic cigarettes compared with combustible cigarettes: direct versus indirect questioning
Source: PubMed Central journal article supplement — Tob Control. 2020 Jun 16;30(4):443–5. Online ahead of print. doi: 10.1136/tobaccocontrol-2019-055404 (PMC7975626; doi:10.1136/tobaccocontrol-2019-055404), 2020-06-16

**Supplemental Figure 1: Direct Comparative Risk (One-Question) Compared to Indirect Comparative Risk (Two-Questions) of E-Cigarette Harms Compared to Cigarettes Among Current Smokers**

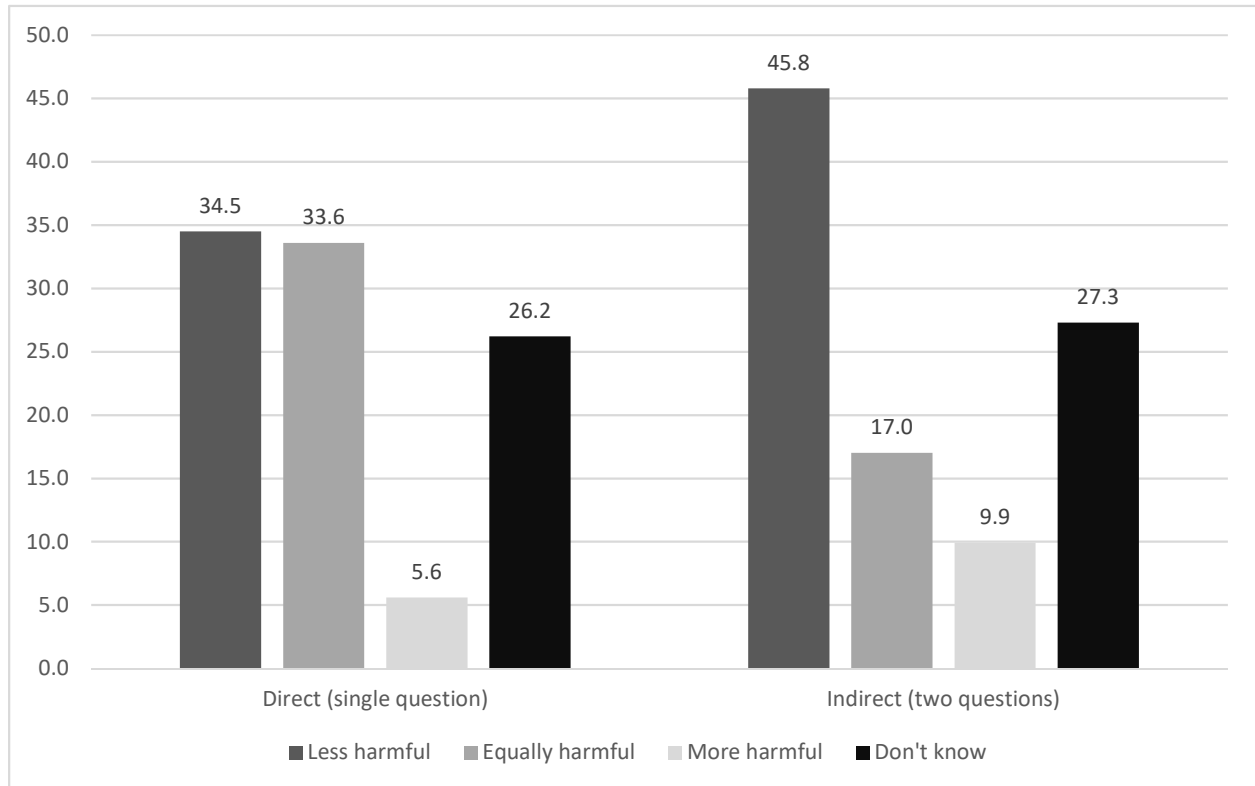

**Supplemental Figure 2:** Direct Comparative Risk (One-Question) Compared to Indirect Comparative Risk (Two-Questions) of E-Cigarette Harms Compared to Cigarettes Among Former Smokers

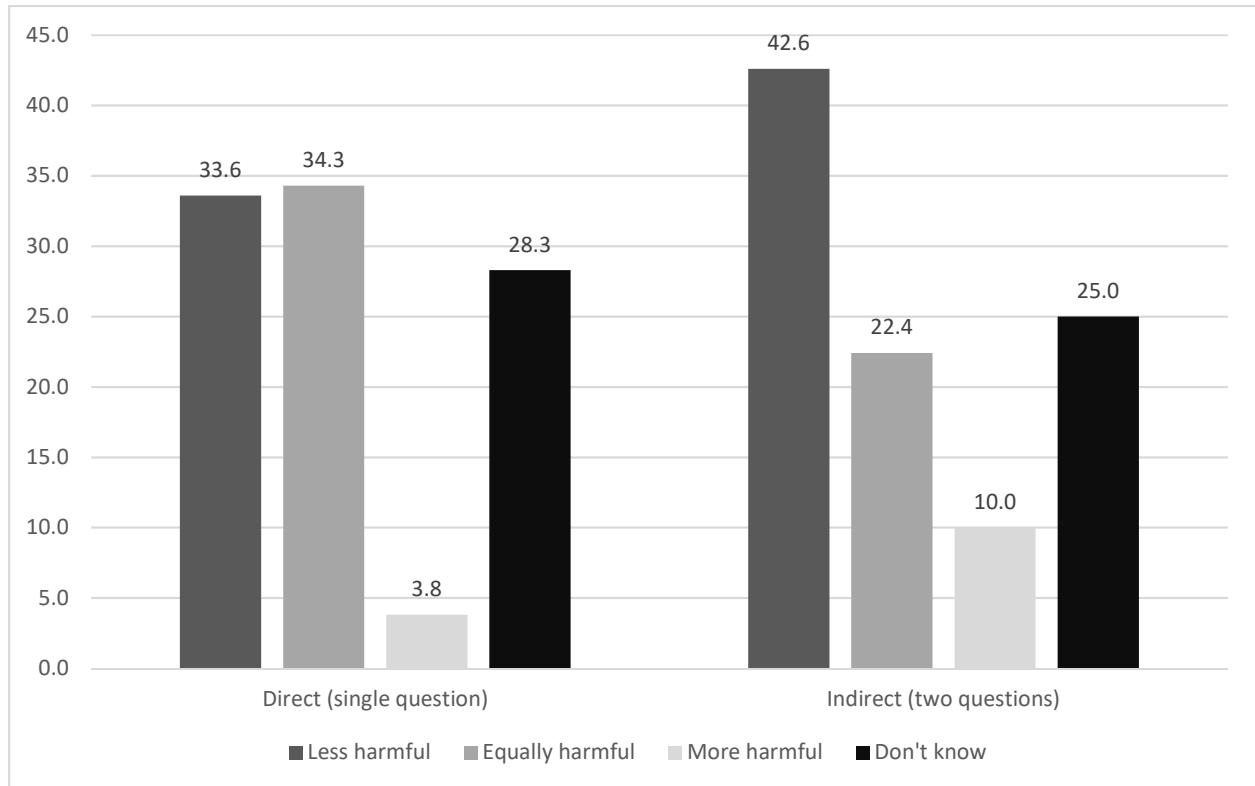

**Supplemental Figure 3:** Direct Comparative Risk (one-question) Compared to Indirect Comparative Risk (Two-Questions) of E-Cigarette Harms Compared to Cigarettes Among Never Smokers

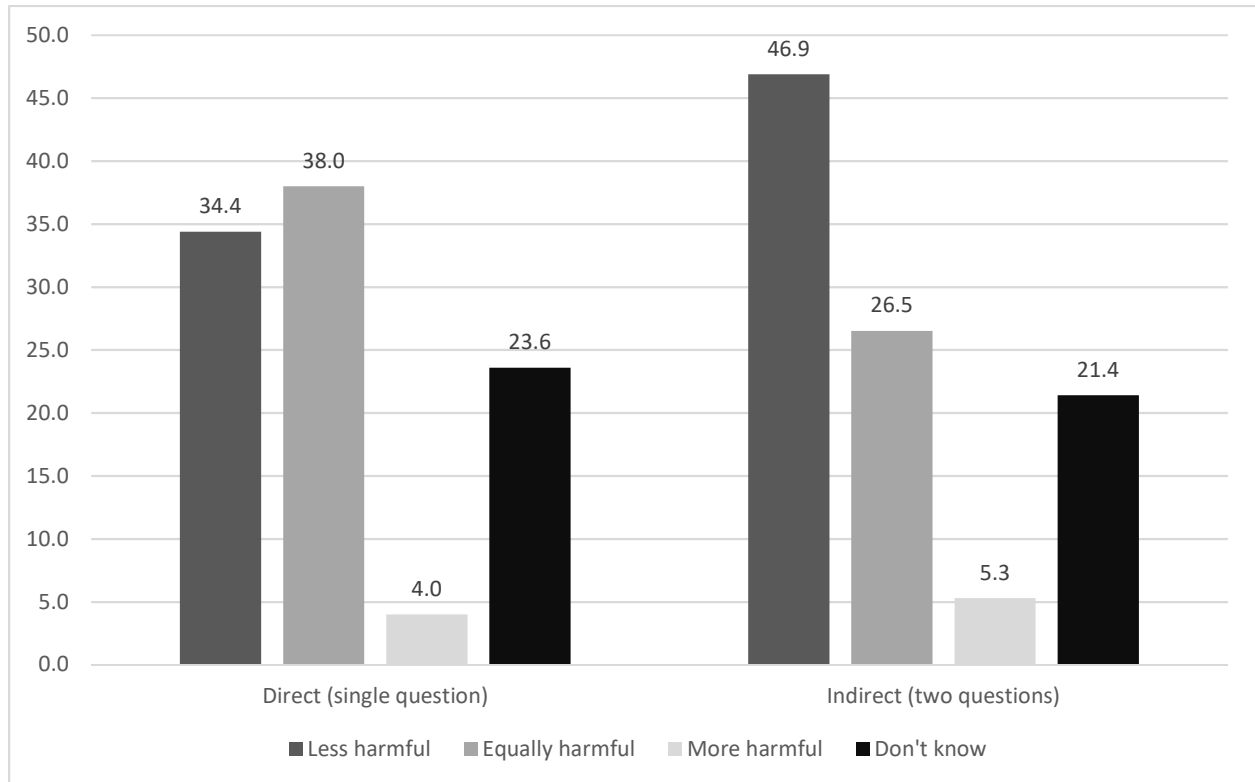

**Supplemental Figure 4:** Histogram of indirect risk calculated scores

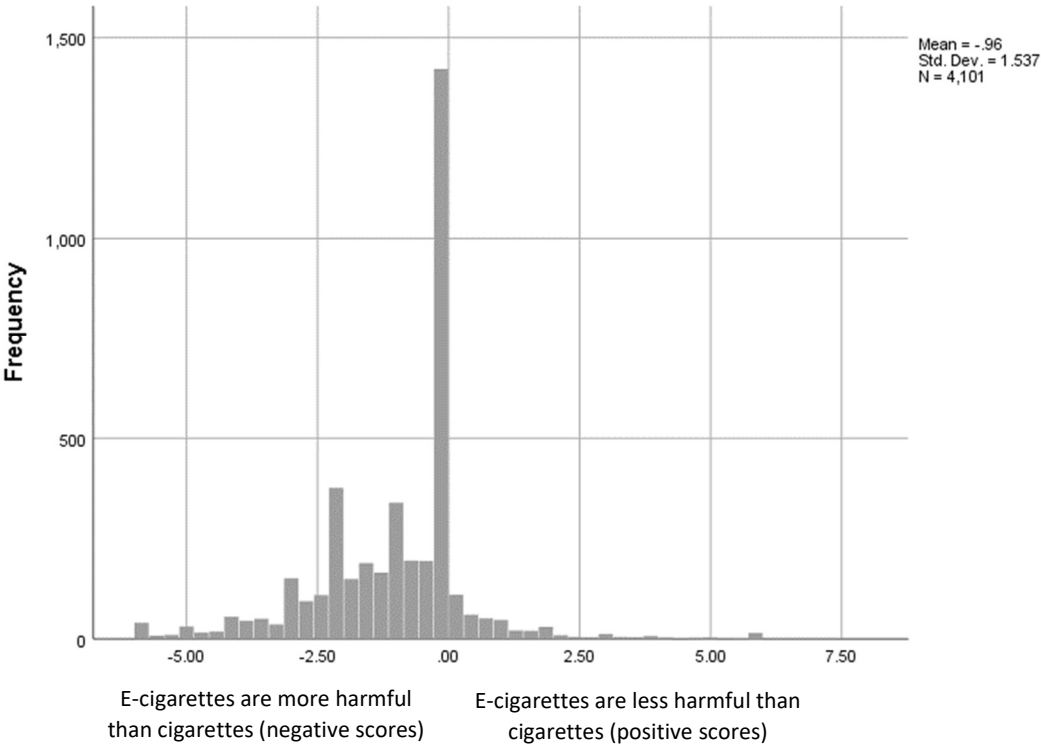

Supplement: NIHMS1664614-supplement-Supplemental_Figures.pdf [file NIHMS1664614-supplement-Supplemental_Figures.pdf]
